# Supplementary material for: Optoelectrical, morphological and mechanical features of nitrophenyl supported poly(1,3,4-oxadiazole)s and their nanocomposites with TiO2
Source: Royal Society of Chemistry journal article supplement (doi:10.1039/c6ra22131a), 2016-01-01
Supplement: c6ra22131a1.pdf [file c6ra22131a1.pdf]

## Supporting Information

### Optoelectrical, Morphological and Mechanical Features of Nitrophenyl Supported Poly(1, 3, 4-oxadazole)s and Their Nanocomposites with TiO<sub>2</sub>

Nimisha Kaippamangalath<sup>1</sup>, Unnikrishnan Gopalakrishnapanicker<sup>1\*</sup>, E. Shiju<sup>2</sup>, K. Chandrasekharan<sup>2</sup>

[nimisha.24387@gmail.com](mailto:nimisha.24387@gmail.com)<sup>1</sup>, [unnig@nitc.ac.in](mailto:unnig@nitc.ac.in)<sup>1\*</sup>, [shijuhcu@gmail.com](mailto:shijuhcu@gmail.com)<sup>2</sup>, [csk@nitc.ac.in](mailto:csk@nitc.ac.in)<sup>2</sup>

<sup>1\*</sup> Phone + 91 495 2285301, Fax + 91 4952287250

<sup>1</sup>Polymer Science and Technology Laboratory, Department of Chemistry, National Institute of Technology, Calicut- 673601, Kerala, India.

<sup>2</sup>Laser and Nonlinear Optics Laboratory, Department of Physics, National Institute of Technology, Calicut- 673601, Kerala, India.

**Key Words:** Materials applications of polymers, Conjugated polymer nanocomposites, Nonlinear optical effect, UV-Visible radiation effects, Fluorescent composites, Cyclic voltammetry, Morphological analysis, Mechanical properties

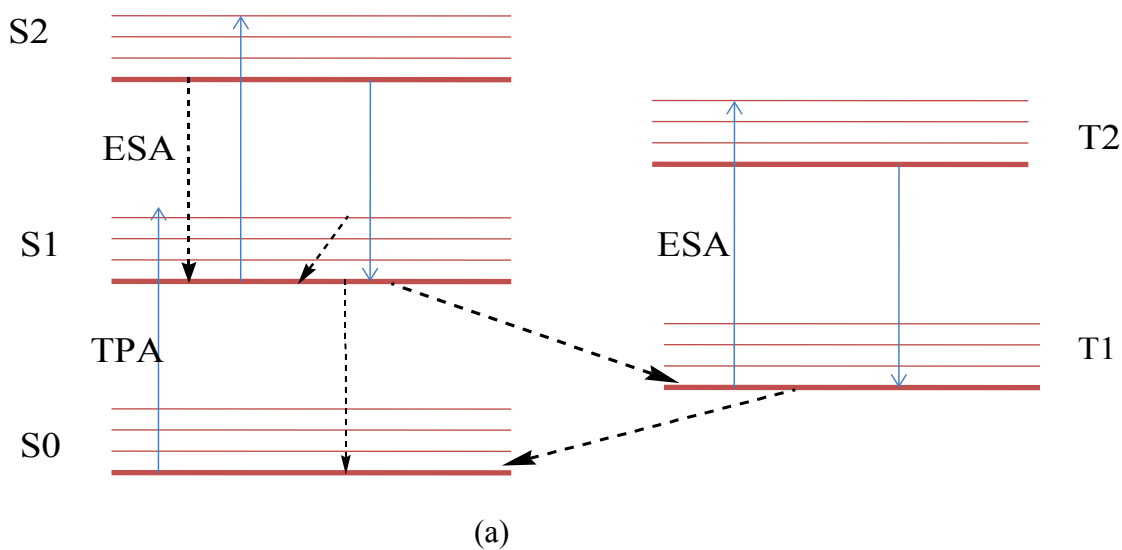

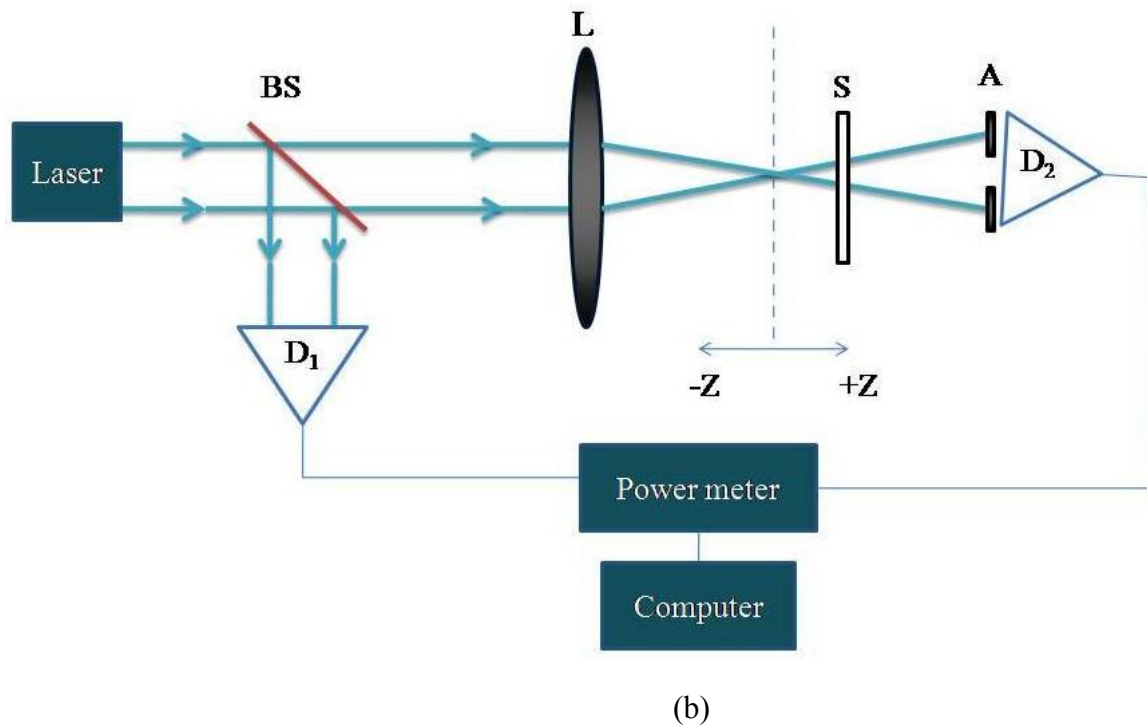

Fig. 1 (a) five-level energy model; (b) Z-scan set up of nonlinear optical process

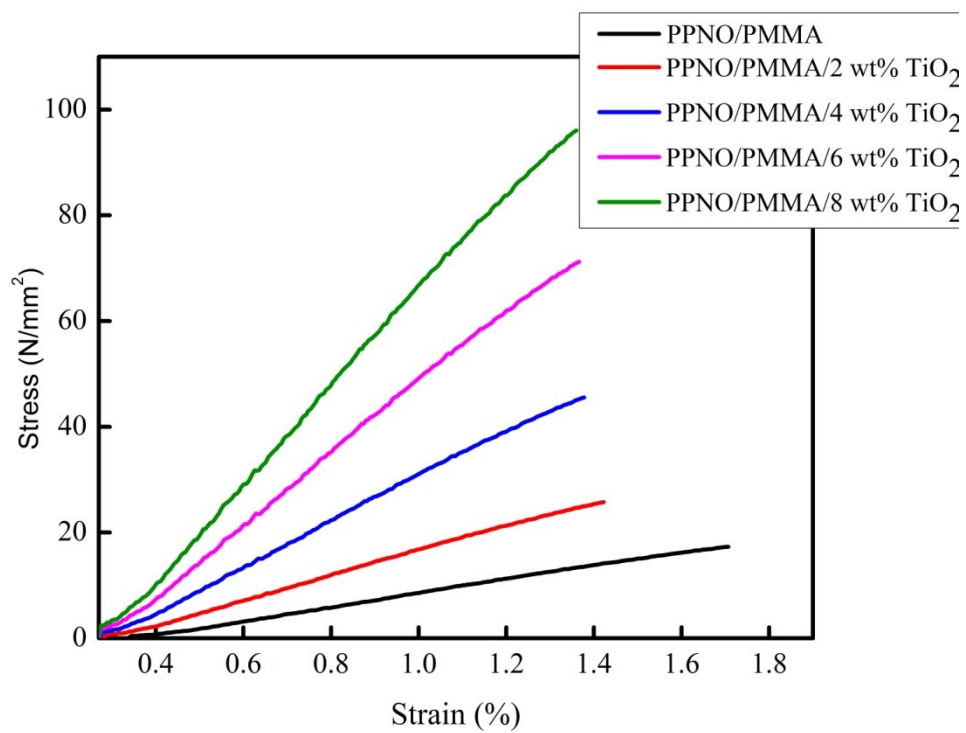

(a)

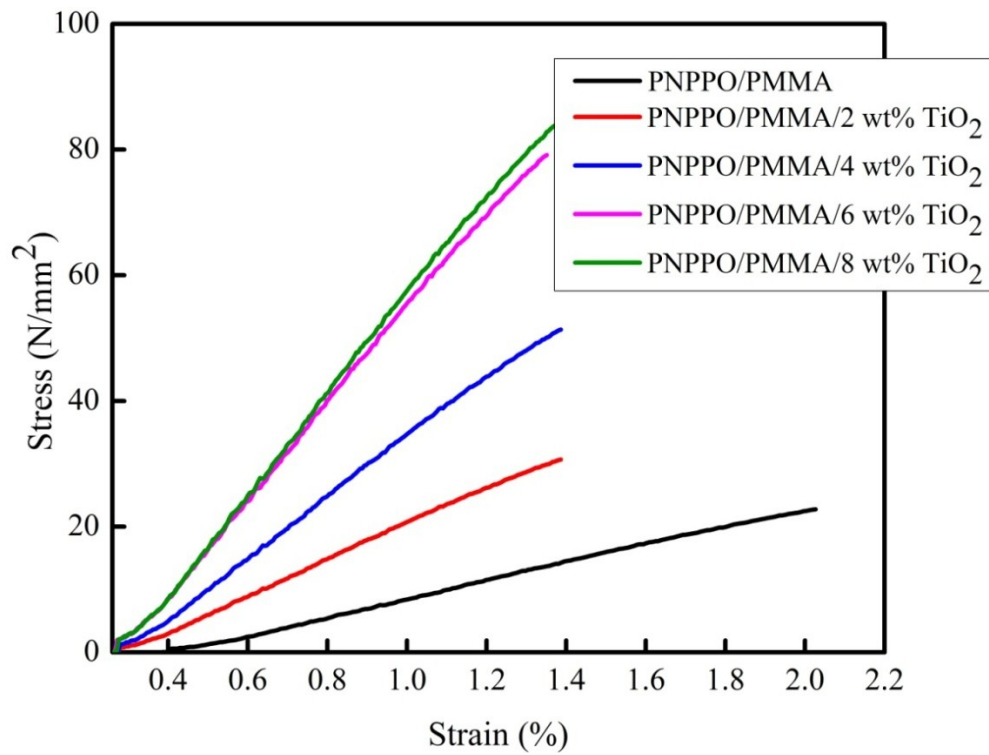

(b)

**Fig. 2** Stress-strain plots of PPNO/PNPPPO nanocomposites with loading of TiO<sub>2</sub> NPs
